# Supplementary material for: Two-step Randomisation: Applying the Results of Small Feasibility Studies of Interventions to Large-scale Mendelian Randomisation Studies to Robustly Infer Causal Effects on Clinical Endpoints
Source: Preprints.org preprint supplement (doi:10.20944/preprints201910.0276.v1), 2019-10-24
Supplement: Supplementary file 1 [file supplementary]

**To be included in the author list:**

the PRACTICAL consortium *

* Members from the PRACTICAL Consortium

**To be included in the Supplement/foot notes:**

**PIs from the PRACTICAL (**[**http://practical.icr.ac.uk/**](http://practical.icr.ac.uk/)**), CRUK, BPC3, CAPS, PEGASUS consortia:**

Rosalind A. Eeles1,2, Brian E. Henderson3, Christopher A. Haiman3, ZSofia Kote-Jarai1, Fredrick R. Schumacher4,5, Sara Benlloch6,1, Ali Amin Al Olama6,9, Kenneth Muir7,8, Sonja I. Berndt10, David V. Conti3, Fredrik Wiklund11, Stephen Chanock10, Susan M. Gapstur12, Victoria L. Stevens12, Catherine M. Tangen13, Jyotsna Batra14,16, Judith Clements15,16, APCB BioResource15, Henrik Gronberg11, Nora Pashayan17,18, Johanna Schleutker19,20, Demetrius Albanes21, Alicja Wolk22,23, Catharine West24, Lorelei Mucci25, Géraldine Cancel-Tassin26,27, Stella Koutros10, Karina Dalsgaard Sorensen28,29, Eli Marie Grindedal30, David E. Neal31,32,33, Freddie C. Hamdy34,35, Jenny L. Donovan36, Ruth C. Travis37, Robert J. Hamilton38,39, Sue Ann Ingles3, Barry S. Rosenstein40, Yong-Jie Lu41, Graham G. Giles42,43,44, Adam S. Kibel45, Ana Vega46,47,48, Manolis Kogevinas49,50,51,52, Kathryn L. Penney53, Jong Y. Park54, Janet L. Stanford55,56, Cezary Cybulski57, Børge G. Nordestgaard58,59, Sune F. Nielsen58,59, Hermann Brenner60,61,62, Christiane Maier63, Jeri Kim64, Esther M. John65, Manuel R. Teixeira66,67, Susan L. Neuhausen68, Kim De Ruyck69, Azad Razack70, Lisa F. Newcomb55,71, Davor Lessel72, Radka Kaneva73, Nawaid Usmani74,75, Frank Claessens76, Paul A. Townsend77, Manuela Gago-Dominguez78,79, Monique J. Roobol80, Florence Menegaux81, Kay-Tee Khaw82, Lisa Cannon-Albright83,84, Hardev Pandha85, Stephen N. Thibodeau86

*In memorium

1 The Institute of Cancer Research, London, UK.

2 Royal Marsden NHS Foundation Trust, London, UK.

3 Department of Preventive Medicine, Keck School of Medicine, University of Southern California/Norris Comprehensive Cancer Center, Los Angeles, CA 90015, USA

4 Department of Population and Quantitative Health Sciences, Case Western Reserve University, Cleveland, OH 44106-7219, USA

5 Seidman Cancer Center, University Hospitals, Cleveland, OH 44106, USA.

6 Centre for Cancer Genetic Epidemiology, Department of Public Health and Primary Care, University of Cambridge, Strangeways Research Laboratory, Cambridge, UK

7 Division of Population Health, Health Services Research and Primary Care, University of Manchester, Oxford Road, Manchester, M13 9PL, UK

8 Warwick Medical School, University of Warwick, Coventry, UK.

9 University of Cambridge, Department of Clinical Neurosciences, Stroke Research Group, R3, Box 83, Cambridge Biomedical Campus, Cambridge CB2 0QQ, UK

10 Division of Cancer Epidemiology and Genetics, National Cancer Institute, NIH, Bethesda, Maryland, 20892, USA

11 Department of Medical Epidemiology and Biostatistics, Karolinska Institute, Stockholm, Sweden.

12 Epidemiology Research Program, American Cancer Society, 250 Williams Street, Atlanta, GA 30303, USA

13 SWOG Statistical Center, Fred Hutchinson Cancer Research Center, Seattle, WA 98109, USA

14 Australian Prostate Cancer Research Centre-Qld, Institute of Health and Biomedical Innovation and School of Biomedical Sciences, Queensland University of Technology, Brisbane, QLD 4059, Australia

15 Australian Prostate Cancer Research Centre-Qld, Institute of Health and Biomedical Innovation and School of Biomedical Sciences, Queensland University of Technology, Brisbane QLD 4059, Australia

16 Translational Research Institute, Brisbane, Queensland 4102, Australia

17 University College London, Department of Applied Health Research, London, UK.

18 Centre for Cancer Genetic Epidemiology, Department of Oncology, University of Cambridge, Strangeways Laboratory, Cambridge, UK.

19 Institute of Biomedicine, Kiinamyllynkatu 10, FI-20014 University of Turku, Finland

20 Department of Medical Genetics, Genomics, Laboratory Division, Turku University Hospital, PO Box 52, 20521 Turku, Finland

21 Division of Cancer Epidemiology and Genetics, National Cancer Institute, NIH, Bethesda, MD 20892, USA

22 Division of Nutritional Epidemiology, Institute of Environmental Medicine, Karolinska Institutet, SE-171 77 Stockholm, Sweden

23 Department of Surgical Sciences, Uppsala University, Uppsala, Sweden

24 Division of Cancer Sciences, University of Manchester, Manchester Academic Health Science Centre, Radiotherapy Related Research, The Christie Hospital NHS Foundation Trust, Manchester, M13 9PL UK

25 Department of Epidemiology, Harvard T.H. Chan School of Pubic Health, Boston, MA, USA.

26 CeRePP, Tenon Hospital, Paris, France

27 Sorbonne Universite, GRC n°5 ONCOTYPE-URO, AP-HP, Tenon Hospital, 4 rue de la Chine, F-75020 Paris, France

28 Department of Molecular Medicine, Aarhus University Hospital, Palle Juul-Jensen Boulevard 99, 8200 Aarhus N, Denmark

29 Department of Clinical Medicine, Aarhus University, DK-8200 Aarhus N

30 Department of Medical Genetics, Oslo University Hospital, Norway.

31 Nuffield Department of Surgical Sciences, University of Oxford, Room 6603, Level 6, John Radcliffe Hospital, Headley Way, Headington, Oxford, OX3 9DU, UK

32 University of Cambridge, Department of Oncology, Addenbrooke's Hospital, Cambridge, UK.

33 Cancer Research UK Cambridge Research Institute, Li Ka Shing Centre, Cambridge, UK.

34 Nuffield Department of Surgical Sciences, University of Oxford, Oxford, OX1 2JD, UK

35 Faculty of Medical Science, University of Oxford, John Radcliffe Hospital, Oxford, UK

36 Population Health Sciences, Bristol Medical School, University of Bristol, BS8 2PS, UK

37 Cancer Epidemiology Unit, Nuffield Department of Population Health University of Oxford, Oxford, UK.

38 Dept. of Surgical Oncology, Princess Margaret Cancer Centre, Toronto, Canada.

39 Dept. of Surgery (Urology), University of Toronto, Canada

40 Department of Radiation Oncology and Department of Genetics and Genomic Sciences, Box 1236, Icahn School of Medicine at Mount Sinai, One Gustave L. Levy Place, New York, NY 10029, USA

41 Centre for Molecular Oncology, Barts Cancer Institute, Queen Mary University of London, John Vane Science Centre, Charterhouse Square, London, EC1M 6BQ, UK

42 Cancer Epidemiology Division, Cancer Council Victoria, 615 St Kilda Road, Melbourne, Victoria 3004, Australia.

43 Centre for Epidemiology and Biostatistics, Melbourne School of Population and Global Health, The University of Melbourne, Grattan Street, Parkville, VIC 3010, Australia

44 Precision Medicine, School of Clinical Sciences at Monash Health. Monash University. Clayton, Victoria, Australia, 3168

45 Division of Urologic Surgery, Brigham and Womens Hospital, 75 Francis Street, Boston, MA 02115, USA

46 Fundación Pública Galega de Medicina Xenómica, Santiago de Compostela, 15706, Spain.

47 Instituto de Investigación Sanitaria de Santiago de Compostela, Santiago De Compostela, 15706, Spain

48 Centro de Investigación en Red de Enfermedades Raras (CIBERER), Spain

49 ISGlobal, Barcelona, Spain.

50 IMIM (Hospital del Mar Research Institute), Barcelona, Spain.

51 Universitat Pompeu Fabra (UPF), Barcelona, Spain.

52 CIBER Epidemiologia y Salud Publica (CIBERESP), Madrid, Spain

53 Channing Division of Network Medicine, Department of Medicine, Brigham and Women's Hospital/Harvard Medical School, Boston, MA, USA.

54 Department of Cancer Epidemiology, Moffitt Cancer Center, 12902 Magnolia Drive, Tampa, FL 33612, USA

55 Division of Public Health Sciences, Fred Hutchinson Cancer Research Center, Seattle, Washington, 98109-1024, USA

56 Department of Epidemiology, School of Public Health, University of Washington, Seattle, Washington, USA.

57 International Hereditary Cancer Center, Department of Genetics and Pathology, Pomeranian Medical University, Szczecin, Poland.

58 Faculty of Health and Medical Sciences, University of Copenhagen, Denmark.

59 Department of Clinical Biochemistry, Herlev and Gentofte Hospital, Copenhagen University Hospital, Herlev, Denmark.

60 Division of Clinical Epidemiology and Aging Research, German Cancer Research Center (DKFZ), Heidelberg, Germany.

61 German Cancer Consortium (DKTK), German Cancer Research Center (DKFZ), Heidelberg, Germany.

62 Division of Preventive Oncology, German Cancer Research Center (DKFZ) and National Center for Tumor Diseases (NCT), Heidelberg, Germany.

63 Institute for Human Genetics, University Hospital Ulm, Ulm, Germany.

64 The University of Texas M. D. Anderson Cancer Center, Department of Genitourinary Medical Oncology, Houston, TX, USA.

65 Department of Medicine, Division of Oncology, Stanford Cancer Institute, Stanford University School of Medicine, Stanford, 780 Welch Road, CJ250C, CA 94304-5769

66 Department of Genetics, Portuguese Oncology Institute of Porto, Porto, Portugal.

67 Biomedical Sciences Institute (ICBAS), University of Porto, Porto, Portugal.

68 Department of Population Sciences, Beckman Research Institute of the City of Hope, Duarte, CA, USA.

69 Ghent University, Faculty of Medicine and Health Sciences, Basic Medical Sciences, Gent, Belgium.

70 Department of Surgery, Faculty of Medicine, University of Malaya, Kuala Lumpur, Malaysia.

71 Department of Urology, University of Washington, 1959 NE Pacific Street, Box 356510, Seattle, WA 98195, USA

72 Institute of Human Genetics, University Medical Center Hamburg-Eppendorf, Hamburg, Germany.

73 Molecular Medicine Center, Department of Medical Chemistry and Biochemistry, Medical University, Sofia, Bulgaria.

74 Department of Oncology, Cross Cancer Institute, University of Alberta, Edmonton, Alberta, Canada.

75 Division of Radiation Oncology, Cross Cancer Institute, Edmonton, Alberta, Canada.

76 Molecular Endocrinology Laboratory, Department of Cellular and Molecular Medicine, KU Leuven, Leuven, Belgium.

77 Division of Cancer Sciences, Manchester Cancer Research Centre, Faculty of Biology, Medicine and Health, Manchester Academic Health Science Centre, NIHR Manchester Biomedical Research Centre, Health Innovation Manchester, Univeristy of Manchester, UK.

78 Genomic Medicine Group, Galician Foundation of Genomic Medicine, Instituto de Investigacion Sanitaria de Santiago de Compostela (IDIS), Complejo Hospitalario Universitario de Santiago, Servicio Galego de Saúde, SERGAS, Santiago De Compostela, Spain.

79 University of California San Diego, Moores Cancer Center, La Jolla, CA, USA.

80 Department of Urology, Erasmus University Medical Center, Rotterdam, the Netherlands.

81 Cancer & Environment Group, Center for Research in Epidemiology and Population Health (CESP), INSERM, University Paris-Sud, University Paris-Saclay, Villejuif, France.

82 Clinical Gerontology Unit, University of Cambridge, Cambridge, UK.

83 Division of Genetic Epidemiology, Department of Medicine, University of Utah School of Medicine, Salt Lake City, Utah, USA.

84 George E. Wahlen Department of Veterans Affairs Medical Center, Salt Lake City, UT, USA.

85 The University of Surrey, Guildford, Surrey, UK.

86 Department of Laboratory Medicine and Pathology, Mayo Clinic, Rochester, MN, USA.

PRACTICAL consortium

Genotyping of the OncoArray was funded by the US National Institutes of Health (NIH) [U19 CA 148537 for ELucidating Loci Involved in Prostate cancer SuscEptibility (ELLIPSE) project and X01HG007492 to the Center for Inherited Disease Research (CIDR) under contract number HHSN268201200008I]. Additional analytic support was provided by NIH NCI U01 CA188392 (PI: Schumacher).

The PRACTICAL consortium was supported by Cancer Research UK Grants C5047/A7357, C1287/A10118, C1287/A16563, C5047/A3354, C5047/A10692, C16913/A6135, European Commission's Seventh Framework Programme grant agreement n° 223175 (HEALTH-F2-2009-223175), and The National Institute of Health (NIH) Cancer Post-Cancer GWAS initiative grant: No. 1 U19 CA 148537-01 (the GAME-ON initiative).

We would also like to thank the following for funding support: The Institute of Cancer Research and The Everyman Campaign, The Prostate Cancer Research Foundation, Prostate Research Campaign UK (now Prostate Action), The Orchid Cancer Appeal, The National Cancer Research Network UK, The National Cancer Research Institute (NCRI) UK. We are grateful for support of NIHR funding to the NIHR Biomedical Research Centre at The Institute of Cancer Research and The Royal Marsden NHS Foundation Trust.
